# Supplementary material for: The Yin and Yang of SagS: Distinct Residues in the HmsP Domain of SagS Independently Regulate Biofilm Formation and Biofilm Drug Tolerance
Source: PubMed Central journal article supplement (PMC5976881; doi:10.1128/msphere.00192-18), 2018-05-30
Supplement: sph003182558sf1.pdf [file sph003182558sf1.pdf]

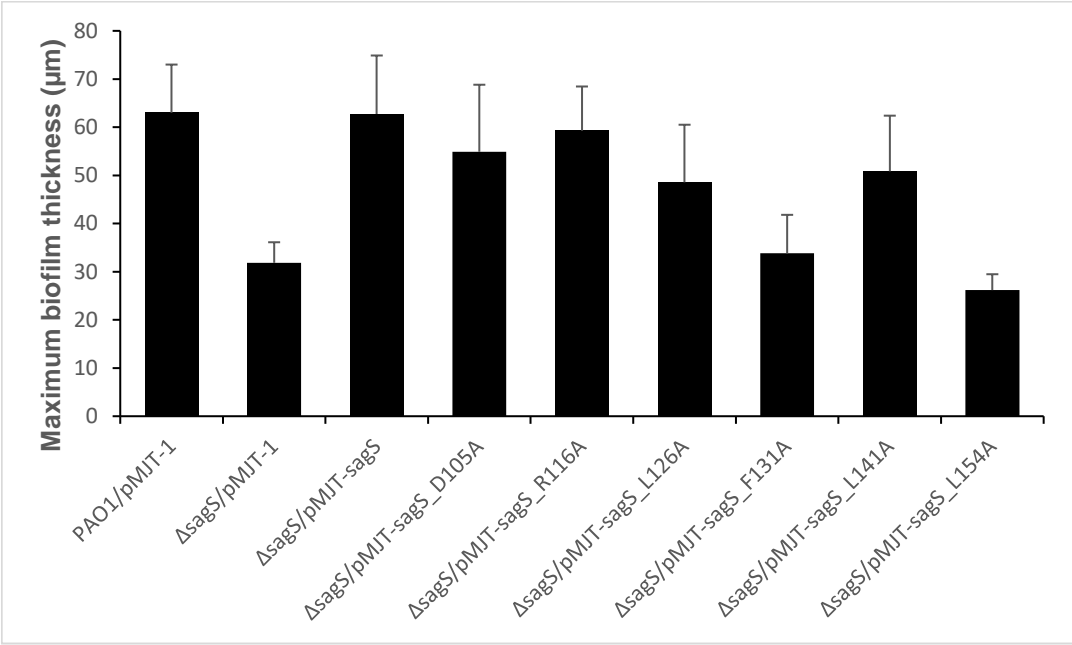

Figure S1.
